# Supplementary material
Source: PubMed Central journal article supplement (PMC3414879)
Supplement: mmc1.pdf [file mmc1.pdf]

## Supporting Material for

# “Rapid calculation of protein pK<sub>a</sub> values using Rosetta”

Krishna Praneeth Kilambi and Jeffrey J. Gray

## METHODS

### Experimental pK<sub>a</sub> dataset

#### *Main dataset*

A diverse set of experimental pK<sub>a</sub> values were collected for Asp, Glu, His, Tyr and Lys from previous studies (1–4) (see Table S4). Residues missing absolute pK<sub>a</sub> values but instead reported to be within a specific range of pH values were omitted. The set comprised 264 amino acid residues, including 76 aspartates, 73 glutamates, 76 histidines, 17 tyrosines and 22 lysines. The protein structures containing these residues include 33 x-ray crystal structures, 5 NMR structures and one structure determined using neutron diffraction. 94% of the selected x-ray crystal structures were determined at a resolution of 2.2 Å or better. Water and ligands were removed from the structures.

#### *Staphylococcal nuclease dataset*

A second smaller test set comprised pK<sub>a</sub> values of all wild-type and mutant residues from either the standard or the highly stable Δ+PHS variant of *staphylococcal* nuclease for which crystal structures were available. The dataset included Asp residues at positions 19, 21, 40 and 95 and Glu residues at positions 10, 43, 52, 57, 67, 73, 75, 101, 122, 129 and 135 from the wild-type Δ+PHS SNase (3BDC). The dataset also included Lys mutants at positions 25 (3ERQ), 34 (3ITP), 38 (2RKS), 62 (3DMU), 66 (2SNM), 72 (2RBM), 92 (1TT2), 103 (3E5S), 104 (3C1F) and 125 (3C1E); Glu mutants at positions 25 (3EVQ), 38 (3D6C), 66 (1U9R), 72 (3ERO), 91 (3D4D), 92 (1TQO) and 104 (3H6M); and Asp mutants at positions 66 (2OXP) and 92 (2OEO).

#### **Standard Rosetta score function**

The standard Rosetta score function includes a Lennard–Jones potential to model the Van der Waals potential (with parameters modified from CHARMM19), the Lazaridis–Karplus Gaussian exclusion implicit solvation model (5), an orientation-dependent hydrogen-bonding term (6), a term based on the probability of proximity of two amino acids (7), a statistical potential for the free energies of the amino-acid side-chain rotamers (8) and reference energies for each amino acid that are summed to approximate the free energy of the denatured state (9).

#### **pK<sub>a</sub> derivation**

During titration in Rosetta-pH, when  $\text{pH} = \text{pK}_a$ ,

$$E_{\text{total}}^{\text{prot}} = E_{\text{total}}^{\text{deprot}}$$

$$E_{\text{pH}}^{\text{prot}} + \sum_{\substack{\text{energies} \\ \text{except pH}}} E_i^{\text{prot}} = E_{\text{pH}}^{\text{deprot}} + \sum_{\substack{\text{energies} \\ \text{except pH}}} E_i^{\text{deprot}}$$

$$E_{\text{pH}}^{\text{prot}} - E_{\text{pH}}^{\text{deprot}} = - \sum_{\substack{\text{energies} \\ \text{except pH}}} (E_i^{\text{prot}} - E_i^{\text{deprot}})$$

$$E_{\text{pH}}^{\text{prot}} - E_{\text{pH}}^{\text{deprot}} = - \sum_{\substack{\text{energies} \\ \text{except pH}}} (E_i^{\text{prot}} - E_i^{\text{deprot}})$$

$$2.3k_B T (\text{pH} - \text{Ip}K_a) = - \sum_{\substack{\text{energies} \\ \text{except pH}}} (E_i^{\text{prot}} - E_i^{\text{deprot}})$$

Substituting  $\text{pH} = \text{p}K_a$ , we get

$$\text{p}K_a = \text{Ip}K_a - \frac{1}{2.3k_B T} \sum_{\substack{\text{energies} \\ \text{except pH}}} (E_i^{\text{prot}} - E_i^{\text{deprot}})$$

where  $E_{\text{total}} = E_{\text{vdw}} + E_{\text{sol}} + E_{\text{elec}} + E_{\text{hbond}} + E_{\text{dun}} + E_{\text{pH}} + E_{\text{ref}}$  and the summations are taken over all score types excluding the protonation potential ( $E_{\text{pH}}$ ).

$E_i^{\text{prot}}$  and  $E_i^{\text{deprot}}$  are scores of the protonated and deprotonated variants, and  $\text{Ip}K_a$  is the unperturbed intrinsic  $\text{p}K_a$  value of the model compound in solution. The ‘deprotonated’ residues include the -1 charge states of Asp, Glu and Tyr, and the neutral His and Lys residues. All other alternate residue charge states are considered to be ‘protonated’. While the total scores  $E_{\text{total}}^{\text{prot}}$  and  $E_{\text{total}}^{\text{deprot}}$  are intended to represent free energies, they only include enthalpy and the water entropy (via the solvation score), and neglect protein entropy.

## Rosetta command line

The calculations in the paper were carried out using Rosetta's developer revision number 46351. All algorithms will be distributed in the next Rosetta release (summer/fall 2012). The Rosetta command-line arguments and scores used for the calculations are as follows.

### (a) Sampling just the target residue side chain

```
pH_protocol . <exe> -database <path_to_rosetta_database>  
-s 2OV0.pdb -no_output  
-pH_mode  
-pka_for_resnos 7 27 -pka_for_chainno A  
-core:weights pH_standard.wts  
-ex1 -ex1:level 3 -ex2 -ex2:level 3  
-extrachi_cutoff 0 -use_input_sc
```

where the  $pK_a$  values are to be calculated for residues 7 and 27 from chain A and 2OV0.pdb

### (b) Sampling the neighboring side chains along with the target residue

```
pH_protocol . <exe> -database <path_to_rosetta_database>  
-s 2OV0.pdb -no_output  
-pH_mode -pH_neighbor_pack -pka_rad 6.0  
-pka_for_resnos 7 27 -pka_for_chainno A  
-core:weights pH_standard.wts  
-ex1 -ex1:level 3 -ex2 -ex2:level 3  
-extrachi_cutoff 0 -use_input_sc
```

### (c) Using RosettaRelax to generate backbone conformational ensemble

```
relax. <exe> -database <path_to_rosetta_database>  
-s 2OV0.pdb -ignore_unrecognized_res -nstruct 50
```

### (d) The scores used for $pK_a$ calculations with their respective weights (pH\_standard.wts)

| Score Type   | Weight |
|--------------|--------|
| fa_atr       | 0.8    |
| fa_rep       | 0.44   |
| fa_sol       | 0.65   |
| fa_intra_rep | 0.004  |
| fa_dun       | 0.56   |
| hbond_lr_bb  | 1.17   |
| hbond_sr_bb  | 1.17   |
| hbond_bb_sc  | 1.17   |
| hbond_sc     | 1.1    |
| hack_elec    | 1.0    |
| e_pH         | 1.0    |
| ref          | 1.0    |

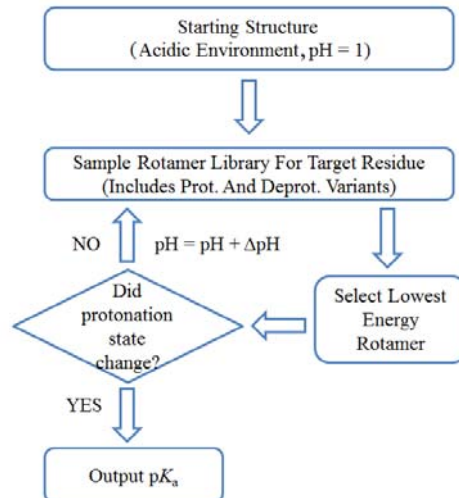

**Figure S1** Algorithm for calculating amino acid  $pK_a$  values using lowest energy conformers.

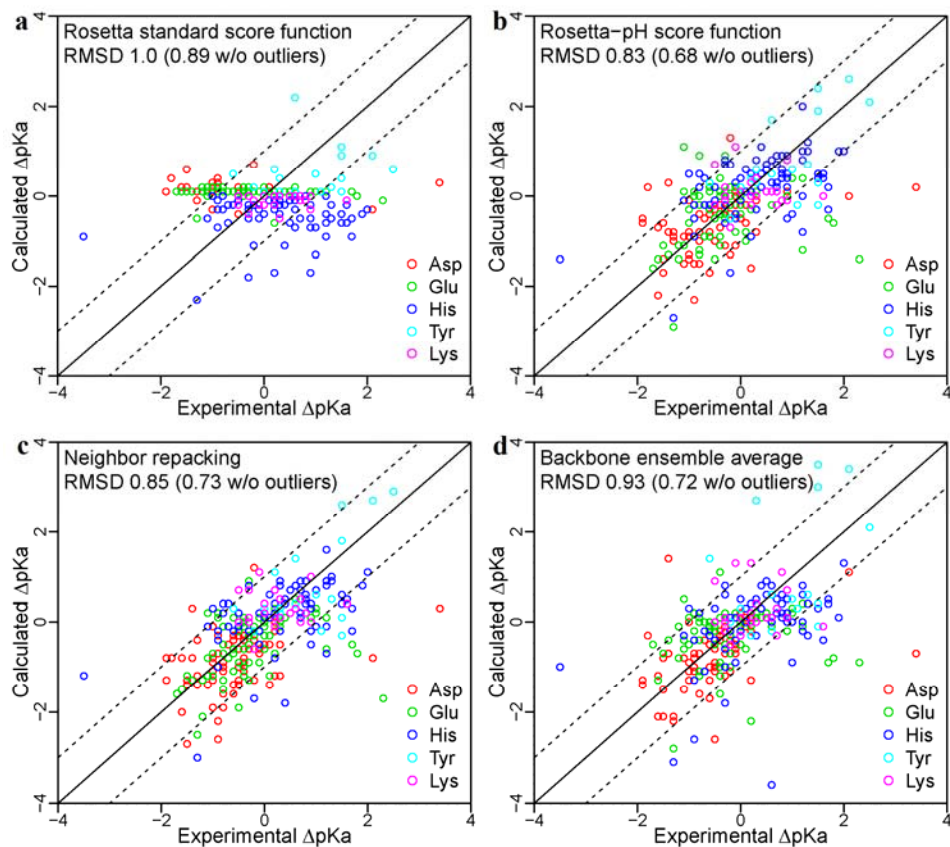

**Figure S2** Correlation between predicted and experimental  $\Delta pK_a$  values calculated using (a) the standard Rosetta score function and the Rosetta-pH score function employing (b) flexible target side chain, (c) flexible neighboring side chains and (d) average over a backbone ensemble of 50 structures.  $\Delta pK_a$  values are evaluated with respect to the reference intrinsic  $pK_a$  values (see Figure 1).

Note: The RMSD values based on  $pK_a$  and  $\Delta pK_a$  values are equivalent:

$$\sqrt{\frac{\sum (\Delta pK_a^{\text{pred}} - \Delta pK_a^{\text{exp}})^2}{n}} = \sqrt{\frac{\sum ((pK_a^{\text{pred}} - I pK_a) - (pK_a^{\text{exp}} - I pK_a))^2}{n}} = \sqrt{\frac{\sum (pK_a^{\text{pred}} - pK_a^{\text{exp}})^2}{n}}$$

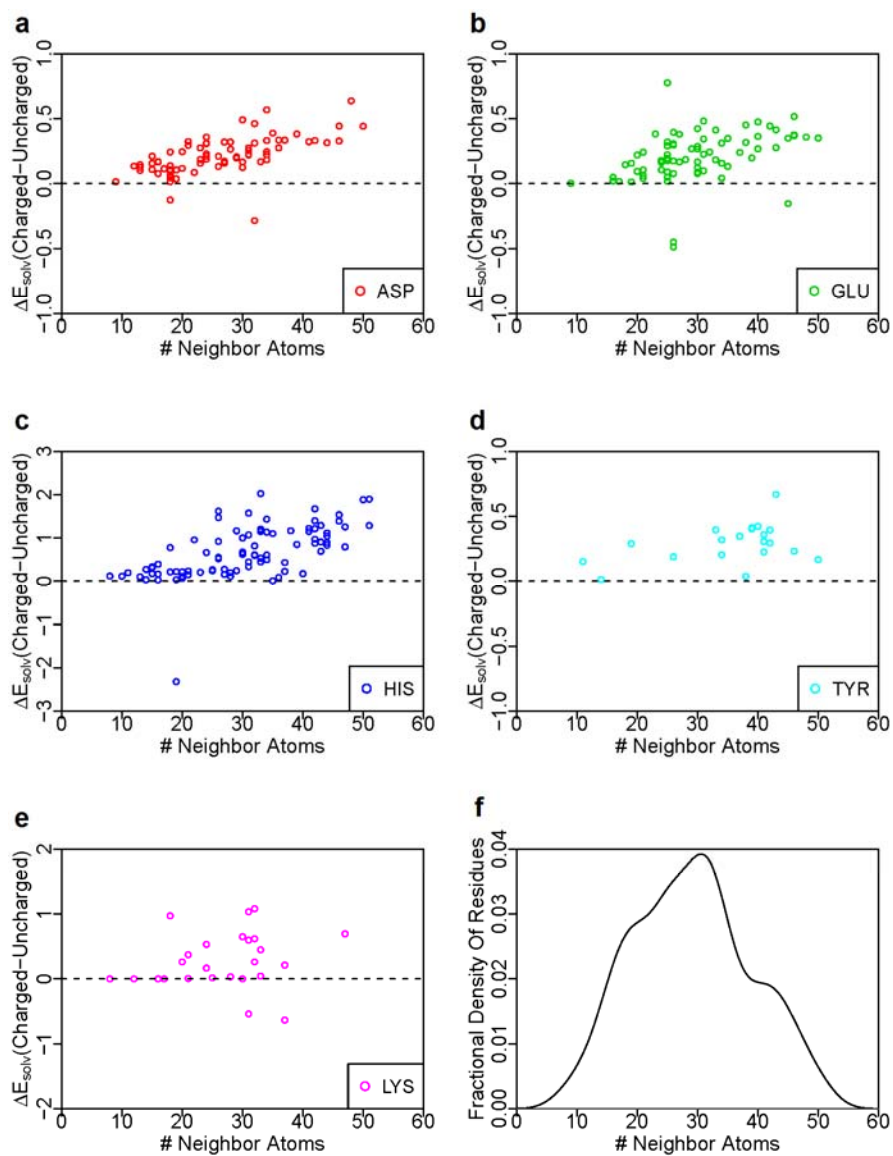

**Figure S3** (a - e) Difference in the solvation energy ( $\Delta E_{\text{solv}}$ ) between charged and neutral variants of ionizable residues plotted versus the number of neighbor atoms (heavy atoms within 6 Å of the residue). (f) The distribution of fraction of total residues in the dataset as a function of the number of neighbor atoms.

**Table S1** Rosetta's residue atom types that determine solvation, Van der Waals and hydrogen bonding parameters for the standard and non-standard amino acid protonation variants.

| Residue          | Atom types                               |                |                              |                                  |
|------------------|------------------------------------------|----------------|------------------------------|----------------------------------|
|                  | ATOM                                     | CHARMM         | Standard protonation variant | Non-standard protonation variant |
| Asp <sup>†</sup> | {O <sub>δ1</sub> } or {O <sub>δ2</sub> } | {OD1} or {OD2} | OOC                          | OH                               |
|                  | {H <sub>δ1</sub> } or {H <sub>δ2</sub> } | {HD1} or {HD2} | -                            | Hpol                             |
| Glu <sup>†</sup> | {O <sub>ε1</sub> } or {O <sub>ε2</sub> } | {OE1} or {OE2} | OOC                          | OH                               |
|                  | {H <sub>ε1</sub> } or {H <sub>ε2</sub> } | {HE1} or {HE2} | -                            | Hpol                             |
| His <sup>‡</sup> | {N <sub>δ1</sub> } or {N <sub>ε2</sub> } | {ND1} or {NE2} | Nhis                         | Ntrp                             |
|                  | {H <sub>δ1</sub> } or {H <sub>ε2</sub> } | {HD1} or {HE2} | -                            | Hpol                             |
| Tyr              | O <sub>ζ</sub>                           | OH             | OH                           | OOC                              |
|                  | H <sub>ζ</sub>                           | HH             | Hpol                         | -                                |
| Lys              | N <sub>ζ</sub>                           | NZ             | Nlys                         | NH2O                             |
|                  | H <sub>ζ3</sub>                          | 3HZ            | Hpol                         | -                                |

<sup>†</sup>For protonated Asp and Glu, sample atom types are shown for both the possible protonation states (with H atoms on O<sub>δ1</sub>/O<sub>δ2</sub> and O<sub>ε1</sub>/O<sub>ε2</sub> atoms).

<sup>‡</sup>For neutral His, the atom types for both the possible tautomers are shown (with H atom on N<sub>δ1</sub> and N<sub>ε2</sub> atoms).

**Table S2** Reference scores ( $aa_{\text{ref}}$ ) for the standard and non-standard amino acid side chain protonation variants.

| Residue | Reference score              |                                  |
|---------|------------------------------|----------------------------------|
|         | Standard protonation variant | Non-standard protonation variant |
| Asp     | -0.67                        | -0.08                            |
| Glu     | -0.81                        | -0.68                            |
| His     | 0.56                         | -0.03                            |
| Tyr     | 0.51                         | 0.97                             |
| Lys     | -0.65                        | -0.52                            |

**Table S3** Percentage of  $pK_a$  predictions within various error ranges from the experimental values while sampling just the target residue.

| Cutoff (pH units) | Asp | Glu | His | Tyr  | Lys  | All |
|-------------------|-----|-----|-----|------|------|-----|
| < 0.5             | 58% | 48% | 50% | 53%  | 55%  | 52% |
| < 1               | 83% | 82% | 70% | 76%  | 82%  | 78% |
| < 1.5             | 92% | 90% | 92% | 94%  | 95%  | 92% |
| < 2               | 96% | 93% | 96% | 100% | 100% | 96% |



**Table S4** Proteins used for  $pK_a$  predictions with their reference PDB IDs<sup>†</sup>, the method used for structure determination, resolution of determined structure (if applicable) and number of residues with experimental  $pK_a$  values chosen for calculations.

| <b>Protein</b>                     | <b>PDB</b> | <b>Method</b> | <b>Resolution (Å)</b> | <b>Number of <math>pK_a</math> values</b> |
|------------------------------------|------------|---------------|-----------------------|-------------------------------------------|
| Silver pheasant ovomucoid          | 2OVO       | x-ray         | 1.50                  | 13                                        |
| Bovine trypsin inhibitor           | 4PTI       | x-ray         | 1.50                  | 12                                        |
| Hen egg white lysozyme             | 2LZT       | x-ray         | 1.97                  | 17                                        |
| Turkey egg white lysozyme          | 135L       | x-ray         | 1.30                  | 6                                         |
| Human lysozyme                     | 1LZ1       | x-ray         | 1.50                  | 1                                         |
| Bovine ribonuclease A              | 3RN3       | x-ray         | 1.45                  | 13                                        |
| Ribonuclease A analog              | 3SRN       | x-ray         | 2.00                  | 3                                         |
| Ribonuclease T1                    | 9RNT       | x-ray         | 1.50                  | 14                                        |
|                                    | 1YGW       | NMR           | -                     | 14                                        |
| E.coli ribonuclease H              | 2RN2       | x-ray         | 1.48                  | 21                                        |
| S.aureofaciens ribonuclease        | 1RGG       | x-ray         | 1.20                  | 20                                        |
| Bromelain inhibitor VI             | 1BI6       | NMR           | -                     | 8                                         |
| Cyclophilin A                      | 2CPL       | x-ray         | 1.63                  | 2                                         |
| FK506 & rapamycin-binding protein  | 1FKS       | NMR           | -                     | 2                                         |
| Horse metmyoglobin                 | 1YMB       | x-ray         | 1.90                  | 4                                         |
| Phosphatidylinositol phospholipase | 1GYM       | x-ray         | 2.20                  | 4                                         |
| Staphylococcal nuclease            | 1STG       | x-ray         | 1.70                  | 3                                         |
| Streptococcal protein G            | 1PGA       | x-ray         | 2.07                  | 10                                        |
| Barnase                            | 1A2P       | x-ray         | 1.50                  | 8                                         |
| Calbindin D9K                      | 4ICB       | x-ray         | 1.60                  | 8                                         |
|                                    | 2BCA       | NMR           | -                     | 8                                         |
| Cobra cardiotoxin V                | 1KXI       | x-ray         | 2.19                  | 2                                         |
| Erabutoxin B                       | 3EBX       | x-ray         | 1.40                  | 1                                         |
| Beta cryptogein                    | 1BEO       | x-ray         | 2.20                  | 3                                         |
| HIV-1 protease KNI-272 complex     | 1HPX       | x-ray         | 2.00                  | 3                                         |
| Human deoxyhaemoglobin             | 4HHB       | x-ray         | 1.74                  | 11                                        |

| <b>Protein</b>                          | <b>PDB</b> | <b>Method</b> | <b>Resolution (Å)</b> | <b>Number of pK<sub>a</sub> values</b> |
|-----------------------------------------|------------|---------------|-----------------------|----------------------------------------|
| Human oxyhaemoglobin                    | 1HHO       | x-ray         | 2.10                  | 10                                     |
| Carbonmonoxymyoglobin                   | 2MB5       | Neutron diff. | -                     | 9                                      |
| Human thioredoxin                       | 1ERT       | x-ray         | 1.70                  | 5                                      |
| Mouse epidermal growth factor           | 1EPI       | NMR           | -                     | 6                                      |
| Ribosomal protein L9                    | 1DIV       | x-ray         | 2.60                  | 6                                      |
| Fibronectin cell adhesion module III-10 | 1FNA       | x-ray         | 1.80                  | 4                                      |
| Mu class glutathione S-transferase      | 6GST       | x-ray         | 2.20                  | 3                                      |
| Streptomyces subtilisin inhibitor       | 3SSI       | x-ray         | 2.30                  | 2                                      |
| B.amyloliquefaciens subtilisin BPN'     | 1DUI       | x-ray         | 2.00                  | 1                                      |
| B. circulans xylanase                   | 1XNB       | x-ray         | 1.49                  | 7                                      |

†The original citations for individual structures can be found in Refs (1–4).

**Table S5** List of experimental predicted  $pK_a$  values using 1) standard Rosetta score function 2) Rosetta-pH score function employing varying degrees of conformational flexibility including a single flexible target side chain (site repack), flexible neighboring side chains (neighbor repack) and the average over an ensemble of conformations (ensemble average).

| <b>PDB</b> | <b>Residue</b> | <b>Chain</b> | <b>Experimental<br/><math>pK_a</math></b> | <b>Standard<br/>Rosetta<br/><math>pK_a</math></b> | <b>Site<br/>repack<br/><math>pK_a</math></b> | <b>Neighbor<br/>repack<br/><math>pK_a</math></b> | <b>Ensemble<br/>average<br/><math>pK_a</math></b> |
|------------|----------------|--------------|-------------------------------------------|---------------------------------------------------|----------------------------------------------|--------------------------------------------------|---------------------------------------------------|
| 2OVO       | Asp-7          | A            | 2.4                                       | 4.1                                               | 3.3                                          | 3.2                                              | 2.8                                               |
| 2OVO       | Asp-27         | A            | 2.2                                       | 4.4                                               | 4.2                                          | 3.2                                              | 3.7                                               |
| 2OVO       | Glu-10         | A            | 4.1                                       | 4.5                                               | 4                                            | 3.9                                              | 3.9                                               |
| 2OVO       | Glu-19         | A            | 3.2                                       | 4.5                                               | 3.3                                          | 3.1                                              | 4.3                                               |
| 2OVO       | Glu-43         | A            | 4.8                                       | 4.5                                               | 4.6                                          | 4.5                                              | 4.5                                               |
| 2OVO       | His-52         | A            | 7.5                                       | 5.9                                               | 7.3                                          | 7.2                                              | 6.1                                               |
| 2OVO       | Tyr-11         | A            | 10.2                                      | 10.6                                              | 10.4                                         | 11.1                                             | 9.7                                               |
| 2OVO       | Tyr-20         | A            | 11.1                                      | 10.1                                              | 9.8                                          | 9.8                                              | 10.3                                              |
| 2OVO       | Tyr-31         | A            | 12.5                                      | 10.6                                              | 12.1                                         | 12.9                                             | 12.1                                              |
| 2OVO       | Lys-13         | A            | 9.9                                       | 10.2                                              | 10.2                                         | 10.4                                             | 11.3                                              |
| 2OVO       | Lys-29         | A            | 11.1                                      | 10.3                                              | 10.2                                         | 10.4                                             | 10.1                                              |
| 2OVO       | Lys-34         | A            | 10.1                                      | 10                                                | 10.3                                         | 10.4                                             | 10.2                                              |
| 2OVO       | Lys-55         | A            | 11.1                                      | 10.4                                              | 10.5                                         | 10.9                                             | 10.7                                              |
| 4PTI       | Asp-3          | A            | 3.6                                       | 4.1                                               | 3.6                                          | 3.6                                              | 3.6                                               |
| 4PTI       | Asp-50         | A            | 3.2                                       | 4.1                                               | 3.2                                          | 3.1                                              | 3.6                                               |
| 4PTI       | Glu-7          | A            | 3.9                                       | 4.5                                               | 3.9                                          | 3.5                                              | 4.3                                               |
| 4PTI       | Glu-49         | A            | 4                                         | 4.5                                               | 3.5                                          | 3.4                                              | 3.5                                               |
| 4PTI       | Tyr-10         | A            | 9.4                                       | 10.5                                              | 10.3                                         | 10.3                                             | 11.4                                              |
| 4PTI       | Tyr-21         | A            | 10                                        | 10.1                                              | 10.2                                         | 10.3                                             | 10.3                                              |
| 4PTI       | Tyr-23         | A            | 11                                        | 10.5                                              | 10.6                                         | 10.6                                             | 10.5                                              |
| 4PTI       | Tyr-35         | A            | 10.6                                      | 12.2                                              | 11.7                                         | 11.4                                             | 9.8                                               |
| 4PTI       | Lys-15         | A            | 10.4                                      | 10.4                                              | 10.5                                         | 10.6                                             | 10.5                                              |
| 4PTI       | Lys-26         | A            | 10.1                                      | 10.4                                              | 10.4                                         | 10.5                                             | 10.4                                              |
| 4PTI       | Lys-41         | A            | 10.6                                      | 10.2                                              | 10.2                                         | 10.3                                             | 10.4                                              |
| 4PTI       | Lys-46         | A            | 9.9                                       | 10.4                                              | 11.1                                         | 11.1                                             | 10.4                                              |
| 2LZT       | Asp-18         | A            | 2.7                                       | 4.1                                               | 3.1                                          | 2.6                                              | 1.8                                               |
| 2LZT       | Asp-52         | A            | 3.7                                       | 4.1                                               | 2.9                                          | 2.7                                              | 3.3                                               |
| 2LZT       | Asp-87         | A            | 2.1                                       | 4.1                                               | 3.4                                          | 2.7                                              | 2.6                                               |
| 2LZT       | Asp-101        | A            | 4.1                                       | 4.2                                               | 3.4                                          | 3.5                                              | 3.9                                               |
| 2LZT       | Asp-119        | A            | 3.2                                       | 4.1                                               | 3                                            | 2.9                                              | 2.9                                               |
| 2LZT       | Glu-7          | A            | 2.9                                       | 4.5                                               | 3.3                                          | 3.2                                              | 3.7                                               |
| 2LZT       | Glu-35         | A            | 6.2                                       | 4.4                                               | 3.8                                          | 3.7                                              | 3.6                                               |
| 2LZT       | His-15         | A            | 5.6                                       | 5.7                                               | 6.1                                          | 6.2                                              | 6.1                                               |
| 2LZT       | Tyr-20         | A            | 10.3                                      | 10.1                                              | 10.3                                         | 10.2                                             | 10.4                                              |
| 2LZT       | Tyr-23         | A            | 9.8                                       | 10.2                                              | 9.5                                          | 9.8                                              | 10                                                |
| 2LZT       | Tyr-53         | A            | 12.1                                      | 10.9                                              | 12.6                                         | 12.7                                             | 13.4                                              |
| 2LZT       | Lys-1          | A            | 10.6                                      | 10.2                                              | 10.4                                         | 10.5                                             | 10.6                                              |
| 2LZT       | Lys-13         | A            | 10.3                                      | 10.2                                              | 11.5                                         | 11.5                                             | 11.7                                              |
| 2LZT       | Lys-33         | A            | 10.4                                      | 10.2                                              | 10.5                                         | 10.8                                             | 10.1                                              |

| <b>PDB</b> | <b>Residue</b> | <b>Chain</b> | <b>Experimental<br/>pK<sub>a</sub></b> | <b>Standard<br/>Rosetta<br/>pK<sub>a</sub></b> | <b>Site<br/>repack<br/>pK<sub>a</sub></b> | <b>Neighbor<br/>repack<br/>pK<sub>a</sub></b> | <b>Ensemble<br/>average<br/>pK<sub>a</sub></b> |
|------------|----------------|--------------|----------------------------------------|------------------------------------------------|-------------------------------------------|-----------------------------------------------|------------------------------------------------|
| 2LZT       | Lys-96         | A            | 10.7                                   | 9.9                                            | 10.8                                      | 10.9                                          | 10.8                                           |
| 2LZT       | Lys-97         | A            | 10.1                                   | 10                                             | 10.6                                      | 11.1                                          | 10.5                                           |
| 2LZT       | Lys-116        | A            | 10.2                                   | 10.3                                           | 9.7                                       | 9.8                                           | 9.9                                            |
| 3RN3       | Asp-38         | A            | 3.5                                    | 4.1                                            | 3.5                                       | 3.1                                           | 3.4                                            |
| 3RN3       | Asp-53         | A            | 3.9                                    | 4.1                                            | 3.8                                       | 3.5                                           | 3.5                                            |
| 3RN3       | Asp-83         | A            | 3.5                                    | 4.1                                            | 2.6                                       | 2.6                                           | 1.4                                            |
| 3RN3       | Asp-121        | A            | 3.1                                    | 4.3                                            | 2.5                                       | 1.4                                           | 3                                              |
| 3RN3       | Glu-2          | A            | 2.8                                    | 4.5                                            | 3                                         | 2.9                                           | 3.1                                            |
| 3RN3       | Glu-9          | A            | 4                                      | 4.5                                            | 4.5                                       | 4.4                                           | 4.5                                            |
| 3RN3       | Glu-49         | A            | 4.7                                    | 4.5                                            | 4.4                                       | 4.3                                           | 4.5                                            |
| 3RN3       | Glu-86         | A            | 4.1                                    | 4.6                                            | 5.3                                       | 5.3                                           | 4.5                                            |
| 3RN3       | Glu-111        | A            | 3.5                                    | 4.6                                            | 4.4                                       | 4.6                                           | 4.2                                            |
| 3RN3       | His-12         | A            | 6.2                                    | 5.8                                            | 6.6                                       | 6.5                                           | 5.9                                            |
| 3RN3       | His-48         | A            | 6                                      | 4.5                                            | 5.7                                       | 6.1                                           | 4.5                                            |
| 3RN3       | His-105        | A            | 6.7                                    | 5.2                                            | 6.5                                       | 6.7                                           | 6.6                                            |
| 3RN3       | His-119        | A            | 6.1                                    | 6.1                                            | 7                                         | 6.1                                           | 6.4                                            |
| 2RN2       | Asp-10         | A            | 6.1                                    | 3.7                                            | 4                                         | 3.2                                           | 5.1                                            |
| 2RN2       | Asp-70         | A            | 2.6                                    | 4.1                                            | 4.3                                       | 4.3                                           | 5.4                                            |
| 2RN2       | Asp-94         | A            | 3.2                                    | 4.1                                            | 3.6                                       | 2.1                                           | 3.6                                            |
| 2RN2       | Asp-134        | A            | 4.1                                    | 4.1                                            | 3.8                                       | 2.6                                           | 4.1                                            |
| 2RN2       | Glu-6          | A            | 4.5                                    | 4.5                                            | 3.6                                       | 3.2                                           | 3.8                                            |
| 2RN2       | Glu-32         | A            | 3.6                                    | 4.5                                            | 3.1                                       | 3.1                                           | 3.3                                            |
| 2RN2       | Glu-48         | A            | 4.4                                    | 4.6                                            | 4.2                                       | 4.3                                           | 4.3                                            |
| 2RN2       | Glu-57         | A            | 3.2                                    | 4.6                                            | 3                                         | 2.3                                           | 3.6                                            |
| 2RN2       | Glu-61         | A            | 3.9                                    | 4.5                                            | 4.3                                       | 4.2                                           | 3.9                                            |
| 2RN2       | Glu-64         | A            | 4.4                                    | 4.5                                            | 4.4                                       | 4.1                                           | 3.9                                            |
| 2RN2       | Glu-119        | A            | 4.1                                    | 4.5                                            | 4                                         | 3.5                                           | 3.9                                            |
| 2RN2       | Glu-129        | A            | 3.6                                    | 4.6                                            | 3.2                                       | 2.9                                           | 3.2                                            |
| 2RN2       | Glu-131        | A            | 4.3                                    | 4.5                                            | 4.6                                       | 4.5                                           | 4.6                                            |
| 2RN2       | Glu-135        | A            | 4.3                                    | 4.5                                            | 3.6                                       | 3.5                                           | 4.6                                            |
| 2RN2       | Glu-147        | A            | 4.2                                    | 4.5                                            | 4.4                                       | 4.2                                           | 4.4                                            |
| 2RN2       | Glu-154        | A            | 4.4                                    | 4.5                                            | 4.2                                       | 4.1                                           | 4.4                                            |
| 2RN2       | His-62         | A            | 7                                      | 6.2                                            | 7.2                                       | 7.2                                           | 6.6                                            |
| 2RN2       | His-83         | A            | 5.5                                    | 6.3                                            | 6.5                                       | 6.5                                           | 6.5                                            |
| 2RN2       | His-114        | A            | 5                                      | 4                                              | 3.6                                       | 3.3                                           | 3.2                                            |
| 2RN2       | His-124        | A            | 7.1                                    | 6.3                                            | 6.7                                       | 6.7                                           | 6.7                                            |
| 2RN2       | His-127        | A            | 7.9                                    | 5.7                                            | 6.7                                       | 6.8                                           | 6.2                                            |
| 9RNT       | Asp-3          | A            | 3.5                                    | 3.6                                            | 2.6                                       | 2.7                                           | 3                                              |
| 9RNT       | Asp-15         | A            | 3.5                                    | 4.1                                            | 3                                         | 3                                             | 2.9                                            |
| 9RNT       | Asp-29         | A            | 4.3                                    | 4.1                                            | 3.2                                       | 2.8                                           | 4                                              |
| 9RNT       | Asp-49         | A            | 4.2                                    | 4.1                                            | 4                                         | 4                                             | 4.1                                            |
| 9RNT       | Asp-66         | A            | 3.9                                    | 4.1                                            | 4.1                                       | 3.3                                           | 3.6                                            |
| 9RNT       | Glu-28         | A            | 5.6                                    | 4.4                                            | 3.2                                       | 3.8                                           | 4.3                                            |

| <b>PDB</b> | <b>Residue</b> | <b>Chain</b> | <b>Experimental<br/>pK<sub>a</sub></b> | <b>Standard<br/>Rosetta<br/>pK<sub>a</sub></b> | <b>Site<br/>repack<br/>pK<sub>a</sub></b> | <b>Neighbor<br/>repack<br/>pK<sub>a</sub></b> | <b>Ensemble<br/>average<br/>pK<sub>a</sub></b> |
|------------|----------------|--------------|----------------------------------------|------------------------------------------------|-------------------------------------------|-----------------------------------------------|------------------------------------------------|
| 9RNT       | Glu-31         | A            | 5.4                                    | 4.5                                            | 4.8                                       | 4.7                                           | 4.6                                            |
| 9RNT       | Glu-46         | A            | 3.6                                    | 4.5                                            | 4.4                                       | 3.9                                           | 4.4                                            |
| 9RNT       | Glu-58         | A            | 4                                      | 4.5                                            | 3.5                                       | 3.2                                           | 2.8                                            |
| 9RNT       | Glu-82         | A            | 3.3                                    | 4.5                                            | 3.3                                       | 3.2                                           | 4.1                                            |
| 9RNT       | Glu-102        | A            | 5.3                                    | 4.5                                            | 4.4                                       | 4.2                                           | 4.5                                            |
| 9RNT       | His-27         | A            | 7                                      | 5.8                                            | 7                                         | 7                                             | 6.8                                            |
| 9RNT       | His-40         | A            | 7.5                                    | 6.3                                            | 8.3                                       | 7.9                                           | 7.1                                            |
| 9RNT       | His-92         | A            | 7.3                                    | 5                                              | 6.9                                       | 7                                             | 6.3                                            |
| 1RGG       | Asp-1          | A            | 3.4                                    | 4.1                                            | 3.7                                       | 3.7                                           | 3.9                                            |
| 1RGG       | Asp-17         | A            | 3.7                                    | 4.1                                            | 3.7                                       | 3.4                                           | 3.8                                            |
| 1RGG       | Asp-25         | A            | 4.9                                    | 4.1                                            | 4.1                                       | 4                                             | 4.2                                            |
| 1RGG       | Asp-33         | A            | 2.4                                    | 4.2                                            | 1.8                                       | 2                                             | 1.9                                            |
| 1RGG       | Asp-79         | A            | 7.4                                    | 4.3                                            | 4.2                                       | 4.3                                           | 3.3                                            |
| 1RGG       | Asp-84         | A            | 3                                      | 3.7                                            | 2.6                                       | 2.1                                           | 3.1                                            |
| 1RGG       | Asp-93         | A            | 3.1                                    | 4.1                                            | 3.8                                       | 3.3                                           | 3.2                                            |
| 1RGG       | Glu-14         | A            | 5                                      | 4.6                                            | 4.2                                       | 4.9                                           | 4.3                                            |
| 1RGG       | Glu-41         | A            | 4.1                                    | 4.5                                            | 4.5                                       | 3.1                                           | 4.4                                            |
| 1RGG       | Glu-54         | A            | 3.4                                    | 4.6                                            | 3.8                                       | 3.7                                           | 4.5                                            |
| 1RGG       | Glu-74         | A            | 3.5                                    | 4.5                                            | 4.5                                       | 4.5                                           | 4.6                                            |
| 1RGG       | Glu-78         | A            | 3.1                                    | 3.9                                            | 1.5                                       | 1.9                                           | 1.6                                            |
| 1RGG       | His-53         | A            | 8.3                                    | 6                                              | 7.3                                       | 7.4                                           | 7.6                                            |
| 1RGG       | His-85         | A            | 6.4                                    | 6.2                                            | 6.4                                       | 6.4                                           | 6.3                                            |
| 1RGG       | Tyr-30         | A            | 11.3                                   | 10.2                                           | 10.7                                      | 10.5                                          | 10.6                                           |
| 1RGG       | Tyr-49         | A            | 10.6                                   | 10.1                                           | 10.5                                      | 10.4                                          | 10.6                                           |
| 1RGG       | Tyr-52         | A            | 11.5                                   | 11.1                                           | 11.9                                      | 11.8                                          | 13.5                                           |
| 1RGG       | Tyr-55         | A            | 11.5                                   | 10.4                                           | 10.3                                      | 10.1                                          | 10.4                                           |
| 1RGG       | Tyr-80         | A            | 11.5                                   | 10.9                                           | 12.4                                      | 12.6                                          | 13                                             |
| 1RGG       | Tyr-81         | A            | 11.5                                   | 10.1                                           | 9.8                                       | 9.7                                           | 9.9                                            |
| 2CPL       | His-70         | A            | 5.8                                    | 6.1                                            | 6.2                                       | 6.2                                           | 5.9                                            |
| 2CPL       | His-126        | A            | 6.3                                    | 5.9                                            | 6.2                                       | 6.4                                           | 6.1                                            |
| 1LZ1       | His-78         | A            | 7.1                                    | 6.2                                            | 6.9                                       | 6.9                                           | 6.5                                            |
| 1YMB       | His-81         | A            | 6.6                                    | 6.2                                            | 7.1                                       | 7.1                                           | 6.8                                            |
| 1YMB       | His-36         | A            | 7.8                                    | 5.7                                            | 6.7                                       | 6.7                                           | 6.6                                            |
| 1YMB       | His-113        | A            | 5.4                                    | 6.2                                            | 5.4                                       | 5.3                                           | 5                                              |
| 1YMB       | His-116        | A            | 6.6                                    | 6.1                                            | 6                                         | 6.1                                           | 6                                              |
| 1GYM       | His-92         | A            | 5.4                                    | 6                                              | 6.1                                       | 6.1                                           | 5.9                                            |
| 1GYM       | His-82         | A            | 6.9                                    | 6                                              | 7.1                                       | 7.1                                           | 6.3                                            |
| 1GYM       | His-32         | A            | 7.6                                    | 5.8                                            | 7.5                                       | 7.2                                           | 6                                              |
| 1GYM       | His-227        | A            | 6.9                                    | 5.6                                            | 6.6                                       | 6.7                                           | 2.7                                            |
| 1STG       | His-46         | A            | 5.7                                    | 6.1                                            | 6.1                                       | 6.1                                           | 6                                              |
| 1STG       | His-8          | A            | 6.8                                    | 6.2                                            | 6.9                                       | 7                                             | 7.2                                            |
| 1STG       | His-124        | A            | 6                                      | 6.3                                            | 6.2                                       | 6.3                                           | 5.3                                            |
| 1PGA       | Asp-22         | A            | 2.9                                    | 4.1                                            | 3.1                                       | 2.8                                           | 2.5                                            |

| <b>PDB</b> | <b>Residue</b> | <b>Chain</b> | <b>Experimental<br/>pK<sub>a</sub></b> | <b>Standard<br/>Rosetta<br/>pK<sub>a</sub></b> | <b>Site<br/>repack<br/>pK<sub>a</sub></b> | <b>Neighbor<br/>repack<br/>pK<sub>a</sub></b> | <b>Ensemble<br/>average<br/>pK<sub>a</sub></b> |
|------------|----------------|--------------|----------------------------------------|------------------------------------------------|-------------------------------------------|-----------------------------------------------|------------------------------------------------|
| 1PGA       | Asp-36         | A            | 3.8                                    | 4.1                                            | 3.8                                       | 3.8                                           | 3.6                                            |
| 1PGA       | Asp-40         | A            | 4                                      | 4.1                                            | 3.9                                       | 3.9                                           | 4                                              |
| 1PGA       | Asp-46         | A            | 3.6                                    | 4.1                                            | 3.3                                       | 2.9                                           | 3                                              |
| 1PGA       | Asp-47         | A            | 3.4                                    | 4.1                                            | 2.3                                       | 2.4                                           | 2.3                                            |
| 1PGA       | Glu-15         | A            | 4.4                                    | 4.5                                            | 4                                         | 3.8                                           | 4.4                                            |
| 1PGA       | Glu-19         | A            | 3.7                                    | 4.5                                            | 3.5                                       | 3.6                                           | 4.4                                            |
| 1PGA       | Glu-27         | A            | 4.5                                    | 4.5                                            | 3.4                                       | 4.1                                           | 4.4                                            |
| 1PGA       | Glu-42         | A            | 4.4                                    | 4.5                                            | 4.5                                       | 4.4                                           | 4.5                                            |
| 1PGA       | Glu-56         | A            | 4                                      | 4.4                                            | 3.3                                       | 3.2                                           | 3.2                                            |
| 1A2P       | Asp-8          | A            | 2.9                                    | 4.1                                            | 2.5                                       | 2.6                                           | 3.2                                            |
| 1A2P       | Asp-12         | A            | 3.8                                    | 4.1                                            | 2.7                                       | 2.7                                           | 2.9                                            |
| 1A2P       | Asp-22         | A            | 3.3                                    | 4.1                                            | 3.5                                       | 3.5                                           | 3.6                                            |
| 1A2P       | Asp-44         | A            | 3.4                                    | 4.1                                            | 3.6                                       | 3.6                                           | 3.5                                            |
| 1A2P       | Asp-75         | A            | 3.1                                    | 4.1                                            | 1.7                                       | 1.8                                           | 1.4                                            |
| 1A2P       | Asp-86         | A            | 4.2                                    | 3.9                                            | 2.4                                       | 2.8                                           | 2.7                                            |
| 1A2P       | Glu-29         | A            | 3.8                                    | 4.5                                            | 4.1                                       | 3.8                                           | 4.1                                            |
| 1A2P       | Glu-60         | A            | 3                                      | 4.5                                            | 3.1                                       | 3.1                                           | 4                                              |
| 4ICB       | Asp-47         | A            | 3                                      | 4.1                                            | 2.7                                       | 2.7                                           | 2.7                                            |
| 4ICB       | Glu-4          | A            | 3.8                                    | 4.5                                            | 4.5                                       | 3.7                                           | 4.2                                            |
| 4ICB       | Glu-5          | A            | 3.4                                    | 4.4                                            | 4.1                                       | 3.2                                           | 3.9                                            |
| 4ICB       | Glu-11         | A            | 4.7                                    | 4.5                                            | 4.5                                       | 4.4                                           | 4.6                                            |
| 4ICB       | Glu-17         | A            | 3.6                                    | 4.6                                            | 5.3                                       | 3.7                                           | 4                                              |
| 4ICB       | Glu-26         | A            | 4.1                                    | 4.5                                            | 5.2                                       | 4.1                                           | 4.6                                            |
| 4ICB       | Glu-48         | A            | 4.6                                    | 4.5                                            | 4.1                                       | 3.7                                           | 4.3                                            |
| 4ICB       | Glu-64         | A            | 3.8                                    | 4.5                                            | 4.6                                       | 4.5                                           | 4.4                                            |
| 1KXI       | Asp-42         | A            | 3.2                                    | 4.1                                            | 2.8                                       | 3                                             | 3.3                                            |
| 1KXI       | Glu-17         | A            | 4                                      | 4.5                                            | 4.5                                       | 4.4                                           | 4.5                                            |
| 1BEO       | Asp-21         | A            | 2.5                                    | 4.6                                            | 2.3                                       | 1.3                                           | 1.9                                            |
| 1BEO       | Asp-30         | A            | 2.5                                    | 4.2                                            | 3.4                                       | 2.7                                           | 3.2                                            |
| 1BEO       | Asp-72         | A            | 2.6                                    | 4.1                                            | 3.2                                       | 3.2                                           | 3.3                                            |
| 1HPX       | Asp-29         | A            | 3.2                                    | 4.1                                            | 2.7                                       | 2.7                                           | 2.4                                            |
| 1HPX       | Asp-30         | A            | 3.9                                    | 4.1                                            | 2.9                                       | 3.1                                           | 3.4                                            |
| 1HPX       | Asp-60         | A            | 3                                      | 4.3                                            | 3.4                                       | 3.1                                           | 2.9                                            |
| 135L       | Asp-18         | A            | 2.7                                    | 4.1                                            | 3                                         | 2.8                                           | 1.8                                            |
| 135L       | Asp-52         | A            | 3.8                                    | 3.9                                            | 3.8                                       | 3.8                                           | 3.7                                            |
| 135L       | Asp-87         | A            | 2.1                                    | 4.1                                            | 3.5                                       | 3.2                                           | 2.7                                            |
| 135L       | Asp-119        | A            | 3.4                                    | 4.1                                            | 3.2                                       | 2.6                                           | 2.7                                            |
| 135L       | Glu-7          | A            | 2.7                                    | 4.5                                            | 2.8                                       | 2.8                                           | 3.9                                            |
| 135L       | Glu-35         | A            | 6.1                                    | 4.5                                            | 3.9                                       | 3.9                                           | 3.5                                            |
| 1DIV       | Asp-8          | A            | 3                                      | 4.1                                            | 3.9                                       | 3.9                                           | 4                                              |
| 1DIV       | Asp-23         | A            | 3.1                                    | 4.1                                            | 3.5                                       | 3.7                                           | 3.3                                            |
| 1DIV       | Glu-17         | A            | 3.6                                    | 4.5                                            | 4.4                                       | 4.3                                           | 4.4                                            |
| 1DIV       | Glu-38         | A            | 4                                      | 4.5                                            | 4.4                                       | 4.3                                           | 4.5                                            |

| <b>PDB</b> | <b>Residue</b> | <b>Chain</b> | <b>Experimental<br/>pK<sub>a</sub></b> | <b>Standard<br/>Rosetta<br/>pK<sub>a</sub></b> | <b>Site<br/>repack<br/>pK<sub>a</sub></b> | <b>Neighbor<br/>repack<br/>pK<sub>a</sub></b> | <b>Ensemble<br/>average<br/>pK<sub>a</sub></b> |
|------------|----------------|--------------|----------------------------------------|------------------------------------------------|-------------------------------------------|-----------------------------------------------|------------------------------------------------|
| 1DIV       | Glu-48         | A            | 4.2                                    | 4.5                                            | 4.2                                       | 4.2                                           | 3.7                                            |
| 1DIV       | Glu-54         | A            | 4.2                                    | 4.6                                            | 3.9                                       | 4.3                                           | 3.4                                            |
| 1XNB       | Asp-4          | A            | 3                                      | 4.1                                            | 3.2                                       | 3.2                                           | 2.7                                            |
| 1XNB       | Asp-11         | A            | 2.5                                    | 4.1                                            | 2.6                                       | 2.6                                           | 2.5                                            |
| 1XNB       | Asp-106        | A            | 2.7                                    | 3.9                                            | 3.2                                       | 3.6                                           | 1.9                                            |
| 1XNB       | Asp-119        | A            | 3.2                                    | 4.2                                            | 2.5                                       | 2.4                                           | 2.9                                            |
| 1XNB       | Asp-121        | A            | 3.6                                    | 4.1                                            | 3.8                                       | 3.7                                           | 3.7                                            |
| 1XNB       | Glu-78         | A            | 4.6                                    | 3.8                                            | 4.1                                       | 4.7                                           | 2.2                                            |
| 1XNB       | Glu-172        | A            | 6.7                                    | 4.3                                            | 3                                         | 2.7                                           | 3.5                                            |
| 4HHB       | His-20         | A            | 6.9                                    | 6.2                                            | 7.1                                       | 7.1                                           | 7.1                                            |
| 4HHB       | His-45         | A            | 7.2                                    | 5.8                                            | 5.8                                       | 5.8                                           | 6.3                                            |
| 4HHB       | His-50         | A            | 7.2                                    | 4.6                                            | 6.5                                       | 6.1                                           | 6.3                                            |
| 4HHB       | His-72         | A            | 6.6                                    | 5.9                                            | 7.1                                       | 7.2                                           | 6.8                                            |
| 4HHB       | His-89         | A            | 7.2                                    | 6.1                                            | 6.8                                       | 6.7                                           | 6.5                                            |
| 4HHB       | His-112        | A            | 7.6                                    | 6.1                                            | 7.3                                       | 7.3                                           | 6.7                                            |
| 4HHB       | His-2          | B            | 6.4                                    | 6.2                                            | 6.9                                       | 6.9                                           | 6.6                                            |
| 4HHB       | His-77         | B            | 6.7                                    | 6.1                                            | 6.8                                       | 6.8                                           | 6.6                                            |
| 4HHB       | His-117        | B            | 8.2                                    | 5.9                                            | 7.3                                       | 7.1                                           | 6.4                                            |
| 4HHB       | His-143        | B            | 6.2                                    | 6.1                                            | 5.8                                       | 5.8                                           | 5.4                                            |
| 4HHB       | His-146        | B            | 7.1                                    | 6.2                                            | 7.2                                       | 7.2                                           | 6.4                                            |
| 1HHO       | His-20         | A            | 6.7                                    | 6.1                                            | 7.4                                       | 4.5                                           | 7.1                                            |
| 1HHO       | His-45         | A            | 7                                      | 6.3                                            | 6.6                                       | 6.5                                           | 6.5                                            |
| 1HHO       | His-50         | A            | 7.5                                    | 6.3                                            | 7.1                                       | 7.1                                           | 6.9                                            |
| 1HHO       | His-72         | A            | 6                                      | 6.1                                            | 7                                         | 7.1                                           | 7.1                                            |
| 1HHO       | His-89         | A            | 7.2                                    | 6.3                                            | 6.7                                       | 6.6                                           | 6.8                                            |
| 1HHO       | His-112        | A            | 7.5                                    | 5.4                                            | 5.5                                       | 5.6                                           | 6.3                                            |
| 1HHO       | His-2          | B            | 6.5                                    | 6                                              | 6.6                                       | 6.7                                           | 6.5                                            |
| 1HHO       | His-77         | B            | 6                                      | 6                                              | 7.1                                       | 7.1                                           | 6.9                                            |
| 1HHO       | His-117        | B            | 8                                      | 5.8                                            | 6                                         | 6.1                                           | 6.7                                            |
| 1HHO       | His-146        | B            | 7.9                                    | 6.1                                            | 6.8                                       | 6.8                                           | 5.9                                            |
| 2MB5       | His-12         | A            | 6.3                                    | 6.3                                            | 6.7                                       | 6.6                                           | 6.8                                            |
| 2MB5       | His-36         | A            | 8                                      | 5.4                                            | 6.5                                       | 6.6                                           | 6.8                                            |
| 2MB5       | His-48         | A            | 5.3                                    | 6.3                                            | 6.8                                       | 6.6                                           | 6.6                                            |
| 2MB5       | His-81         | A            | 6.6                                    | 6.2                                            | 7.1                                       | 7.1                                           | 6.8                                            |
| 2MB5       | His-97         | A            | 5.6                                    | 6.1                                            | 6.7                                       | 6.7                                           | 5.2                                            |
| 2MB5       | Tyr-103        | A            | 10.3                                   | 10.4                                           | 10.6                                      | 10.3                                          | 12.7                                           |
| 2MB5       | His-113        | A            | 5.4                                    | 5.6                                            | 5.8                                       | 5.9                                           | 3.7                                            |
| 2MB5       | His-116        | A            | 6.5                                    | 6.2                                            | 6.8                                       | 6.7                                           | 6.7                                            |
| 2MB5       | His-119        | A            | 6.1                                    | 5.2                                            | 4.6                                       | 4.6                                           | 6.1                                            |
| 1ERT       | Glu-13         | A            | 4.8                                    | 4.5                                            | 4.6                                       | 4.5                                           | 4.5                                            |
| 1ERT       | Asp-16         | A            | 3.7                                    | 4.1                                            | 4                                         | 4                                             | 3.9                                            |
| 1ERT       | Asp-20         | A            | 3.6                                    | 4.1                                            | 3.3                                       | 3.1                                           | 3.8                                            |
| 1ERT       | His-43         | A            | 5.5                                    | 6                                              | 6.8                                       | 6.7                                           | 6.5                                            |

| <b>PDB</b> | <b>Residue</b> | <b>Chain</b> | <b>Experimental<br/>pK<sub>a</sub></b> | <b>Standard<br/>Rosetta<br/>pK<sub>a</sub></b> | <b>Site<br/>repack<br/>pK<sub>a</sub></b> | <b>Neighbor<br/>repack<br/>pK<sub>a</sub></b> | <b>Ensemble<br/>average<br/>pK<sub>a</sub></b> |
|------------|----------------|--------------|----------------------------------------|------------------------------------------------|-------------------------------------------|-----------------------------------------------|------------------------------------------------|
| 1ERT       | Glu-103        | A            | 4.9                                    | 4.5                                            | 4.5                                       | 4.6                                           | 4.6                                            |
| 1FNA       | Glu-38         | A            | 3.8                                    | 4.5                                            | 3.5                                       | 3.3                                           | 4.3                                            |
| 1FNA       | Glu-47         | A            | 3.9                                    | 4.5                                            | 3                                         | 2.5                                           | 4.2                                            |
| 1FNA       | Asp-67         | A            | 4.2                                    | 4.1                                            | 4.1                                       | 2.8                                           | 3.8                                            |
| 1FNA       | Asp-80         | A            | 3.4                                    | 4.1                                            | 3.8                                       | 3.8                                           | 3                                              |
| 3SRN       | His-12         | A            | 6                                      | 5.9                                            | 6.2                                       | 6.1                                           | 5.7                                            |
| 3SRN       | His-105        | A            | 6.5                                    | 4.6                                            | 5.4                                       | 5.5                                           | 6.3                                            |
| 3SRN       | His-119        | B            | 6.2                                    | 6                                              | 5.9                                       | 6.1                                           | 6.4                                            |
| 6GST       | His-83         | A            | 5.2                                    | 5.8                                            | 6.2                                       | 6.2                                           | 6                                              |
| 6GST       | His-84         | A            | 7.1                                    | 6.2                                            | 6.8                                       | 6.8                                           | 6.9                                            |
| 6GST       | His-167        | A            | 7.8                                    | 5.9                                            | 6.8                                       | 6.9                                           | 6.6                                            |
| 3SSI       | His-43         | A            | 3.2                                    | 2                                              | 1.8                                       | 1.6                                           | 1.4                                            |
| 3SSI       | His-106        | A            | 6                                      | 5.8                                            | 6.1                                       | 6.1                                           | 6.1                                            |
| 3EBX       | His-6          | A            | 2.8                                    | 5.4                                            | 4.9                                       | 5.1                                           | 5.3                                            |
| 1DUI       | His-64         | A            | 7.2                                    | 5.6                                            | 7.2                                       | 7.3                                           | 6.5                                            |
| 1YGW       | Asp-3          | A            | 3.5                                    | 4.1                                            | 3.5                                       | 3.4                                           | 3.1                                            |
| 1YGW       | Asp-15         | A            | 3.5                                    | 4.2                                            | 3.7                                       | 3.7                                           | 2.9                                            |
| 1YGW       | Asp-29         | A            | 4.3                                    | 4.1                                            | 3.9                                       | 3.5                                           | 4                                              |
| 1YGW       | Asp-49         | A            | 4.2                                    | 4.1                                            | 3.8                                       | 3.8                                           | 3.9                                            |
| 1YGW       | Asp-66         | A            | 3.9                                    | 4.1                                            | 3.6                                       | 3.4                                           | 3.3                                            |
| 1YGW       | Glu-28         | A            | 5.6                                    | 4.5                                            | 4.8                                       | 4.5                                           | 4.8                                            |
| 1YGW       | Glu-31         | A            | 5.4                                    | 4.5                                            | 4.8                                       | 4.6                                           | 4.7                                            |
| 1YGW       | Glu-46         | A            | 3.6                                    | 4.5                                            | 4.2                                       | 4.3                                           | 4.5                                            |
| 1YGW       | Glu-58         | A            | 4                                      | 4.6                                            | 4                                         | 3.8                                           | 3.4                                            |
| 1YGW       | Glu-82         | A            | 3.3                                    | 4.4                                            | 4.3                                       | 4.6                                           | 4                                              |
| 1YGW       | Glu-102        | A            | 5.3                                    | 4.5                                            | 4.6                                       | 4.5                                           | 4.2                                            |
| 1YGW       | His-27         | A            | 7                                      | 5.8                                            | 6.5                                       | 6.4                                           | 6.8                                            |
| 1YGW       | His-40         | A            | 7.5                                    | 5.7                                            | 6.3                                       | 6.2                                           | 6.9                                            |
| 1YGW       | His-92         | A            | 7.3                                    | 5.6                                            | 5.9                                       | 6.2                                           | 5.4                                            |
| 1BI6       | Glu-5          | L            | 4                                      | 4.5                                            | 4.8                                       | 4.5                                           | 5.5                                            |
| 1BI6       | Asp-9          | H            | 3                                      | 4.2                                            | 3.1                                       | 2.9                                           | 2.7                                            |
| 1BI6       | Asp-13         | H            | 3.8                                    | 4.1                                            | 3.6                                       | 3.6                                           | 3.6                                            |
| 1BI6       | Asp-32         | H            | 3.1                                    | 4.4                                            | 3.8                                       | 3.7                                           | 2.9                                            |
| 1BI6       | Asp-38         | H            | 3.7                                    | 4.1                                            | 3.4                                       | 3.4                                           | 2.8                                            |
| 1BI6       | Glu-1          | H            | 3.3                                    | 4.6                                            | 5.5                                       | 3.6                                           | 3.8                                            |
| 1BI6       | Glu-2          | H            | 3.3                                    | 4.6                                            | 4.5                                       | 4.3                                           | 4.9                                            |
| 1BI6       | Glu-24         | H            | 4.2                                    | 4.5                                            | 4.6                                       | 4.1                                           | 4.1                                            |
| 1FKS       | His-94         | A            | 5.8                                    | 6.2                                            | 6.5                                       | 6.5                                           | 6.6                                            |
| 1FKS       | His-87         | A            | 6.5                                    | 6                                              | 6.4                                       | 6.5                                           | 6.7                                            |
| 2BCA       | Lys-7          | A            | 10.6                                   | 10.4                                           | 10.7                                      | 11.1                                          | 11.7                                           |
| 2BCA       | Lys-12         | A            | 11.3                                   | 10.4                                           | 10.3                                      | 10.4                                          | 10.5                                           |
| 2BCA       | Lys-16         | A            | 11                                     | 10.4                                           | 10.5                                      | 10.7                                          | 10.5                                           |
| 2BCA       | Lys-29         | A            | 11.2                                   | 10.3                                           | 10.3                                      | 10.6                                          | 11.5                                           |



| <b>PDB</b> | <b>Residue</b> | <b>Chain</b> | <b>Experimental<br/>pK<sub>a</sub></b> | <b>Standard<br/>Rosetta<br/>pK<sub>a</sub></b> | <b>Site<br/>repack<br/>pK<sub>a</sub></b> | <b>Neighbor<br/>repack<br/>pK<sub>a</sub></b> | <b>Ensemble<br/>average<br/>pK<sub>a</sub></b> |
|------------|----------------|--------------|----------------------------------------|------------------------------------------------|-------------------------------------------|-----------------------------------------------|------------------------------------------------|
| 2BCA       | Lys-41         | A            | 10.9                                   | 10.4                                           | 10.5                                      | 10.6                                          | 10.5                                           |
| 2BCA       | Lys-55         | A            | 12                                     | 10.3                                           | 10.4                                      | 10.8                                          | 10.3                                           |
| 2BCA       | Lys-71         | A            | 10.7                                   | 10.4                                           | 10.4                                      | 10.5                                          | 10.4                                           |
| 2BCA       | Lys-72         | A            | 11.3                                   | 10.1                                           | 11.2                                      | 11.4                                          | 11.1                                           |
| 1EPI       | Asp-11         | A            | 3.9                                    | 4.1                                            | 4                                         | 4.1                                           | 4.1                                            |
| 1EPI       | His-22         | A            | 6.8                                    | 5.7                                            | 7                                         | 7                                             | 6.9                                            |
| 1EPI       | Glu-24         | A            | 4.1                                    | 4.5                                            | 3.9                                       | 3.9                                           | 4.4                                            |
| 1EPI       | Asp-27         | A            | 4                                      | 4.1                                            | 3.5                                       | 3.5                                           | 4.2                                            |
| 1EPI       | Asp-40         | A            | 3.6                                    | 4.1                                            | 3.1                                       | 3.2                                           | 4.1                                            |
| 1EPI       | Asp-46         | A            | 3.8                                    | 4.7                                            | 5.3                                       | 5.2                                           | 3.8                                            |

## SUPPORTING REFERENCES

1. Forsyth, W.R., J.M. Antosiewicz, and A.D. Robertson. 2002. Empirical relationships between protein structure and carboxyl pKa values in proteins. *Proteins*. 48: 388–403.
2. Edgcomb, S.P., and K.P. Murphy. 2002. Variability in the pKa of histidine side-chains correlates with burial within proteins. *Proteins*. 49: 1–6.
3. Wisz, M.S., and H.W. Hellinga. 2003. An empirical model for electrostatic interactions in proteins incorporating multiple geometry-dependent dielectric constants. *Proteins*. 51: 360–377.
4. Li, H., A.D. Robertson, and J.H. Jensen. 2005. Very fast empirical prediction and rationalization of protein pKa values. *Proteins*. 61: 704–721.
5. Lazaridis, T., and M. Karplus. 1999. Effective energy function for proteins in solution. *Proteins*. 35: 133–152.
6. Kortemme, T., A.V. Morozov, and D. Baker. 2003. An Orientation-dependent Hydrogen Bonding Potential Improves Prediction of Specificity and Structure for Proteins and Protein-Protein Complexes. *J. Mol. Biol.* 326: 1239–1259.
7. Simons, K.T., I. Ruczinski, C. Kooperberg, B.A. Fox, C. Bystroff, et al. 1999. Improved recognition of native-like protein structures using a combination of sequence-dependent and sequence-independent features of proteins. *Proteins*. 34: 82–95.
8. Dunbrack, R.L., and F.E. Cohen. 1997. Bayesian statistical analysis of protein side-chain rotamer preferences. *Protein Science*. 6: 1661–1681.
9. Kuhlman, B., and D. Baker. 2000. Native protein sequences are close to optimal for their structures. *Proc. Natl. Acad. Sci. USA*. 97: 10383 –10388.
